# Supplementary material for: Monolithic-Structured Single-Layered Textile-Based Dye-Sensitized Solar Cells
Source: PubMed Central journal article supplement (PMC5052609; doi:10.1038/srep34249), 2016-10-06
Supplement: srep34249-s1.pdf [file srep34249-s1.pdf]

## Supplementary Information

### Monolithic Structured Single Layered Textile Based Dye-Sensitized Solar Cell

Min Ju Yun<sup>1,2</sup>, Seung I. Cha<sup>\*1</sup>, Han Seong kim<sup>2</sup>, Seon Hee Seo<sup>1</sup>, , Dong Y. Lee<sup>1</sup>

1. Nano Hybrid Technology Research Center, Creative and Fundamental Research Division,  
Korea Electrotechnology Research Institute

2. Department of Organic Material Science and Engineering, Pusan National University

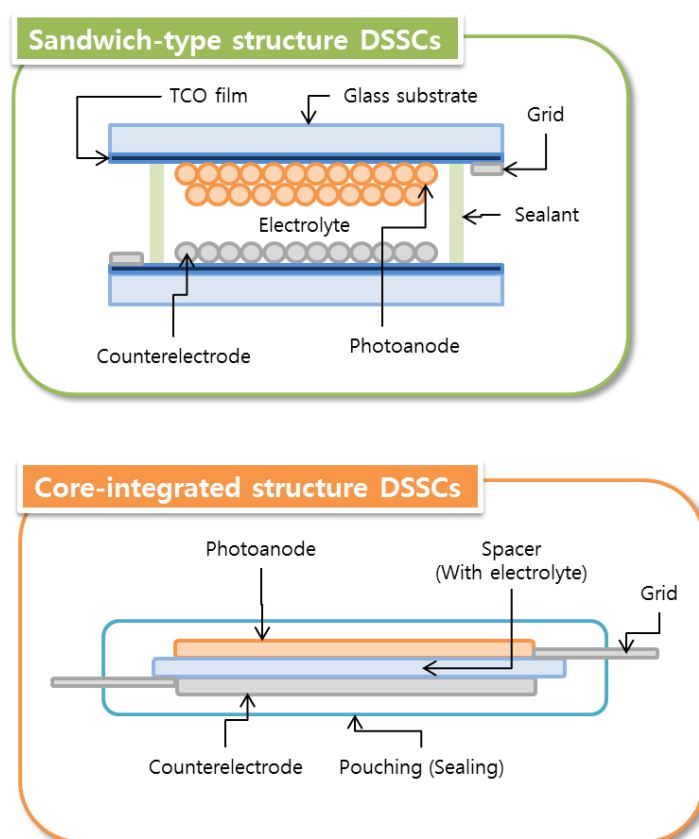

**Figure S1.** Comparing between the sandwich-type structure DSSC and core-integrated structure DSSC

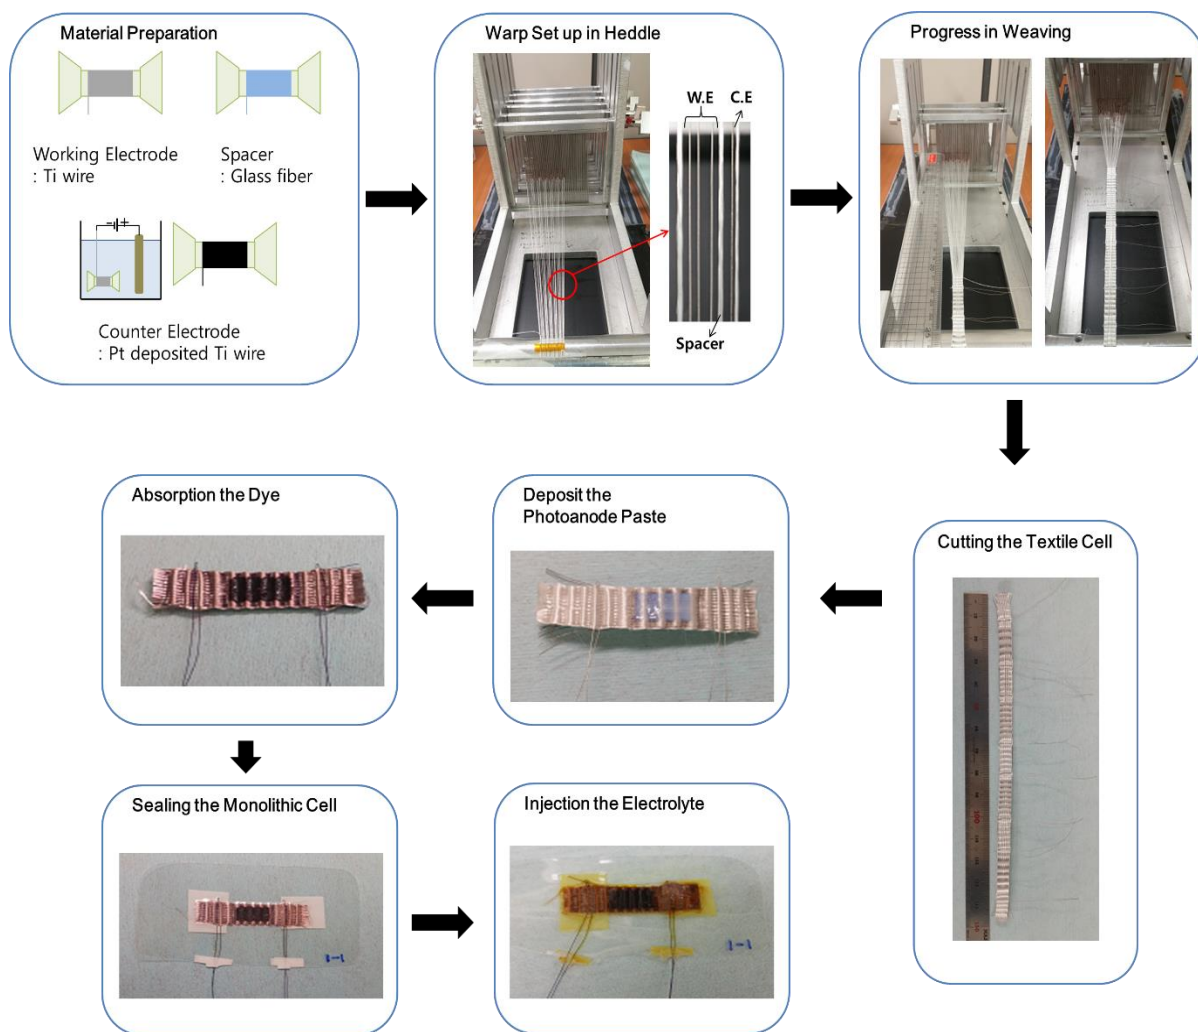

**Figure S2.** Photographs of all process include setting up the materials, weaving the single layer textile, deposition of the photoanode, stained dye, sealing and injected electrolyte

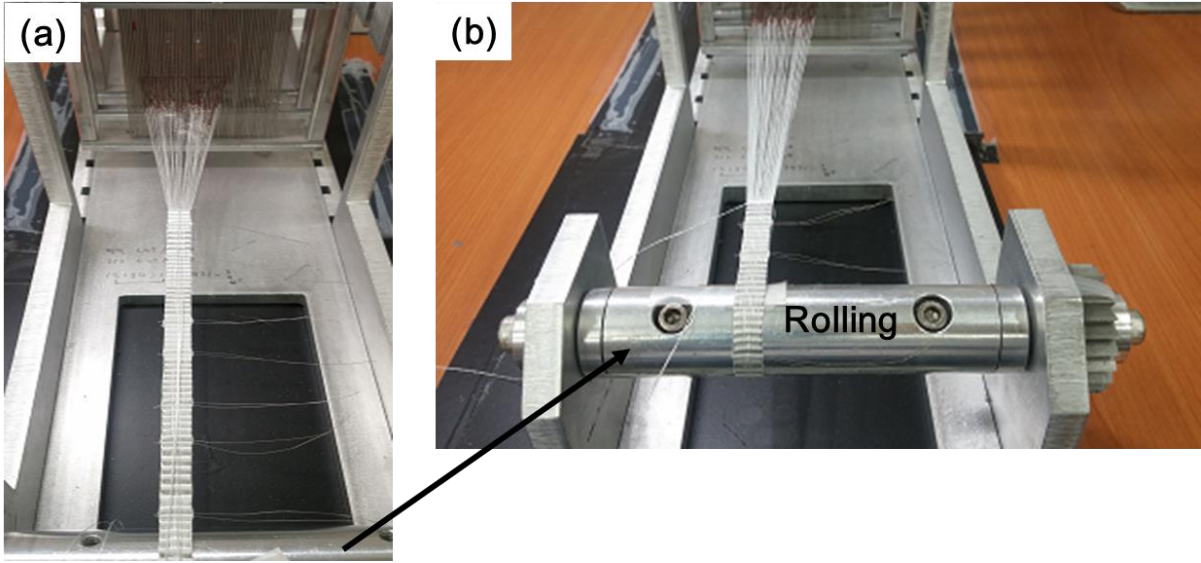

**Figure S3.** Photograph of (a) roll from the front part of table-top loom and (b) rolled single layer textile cell by rolling

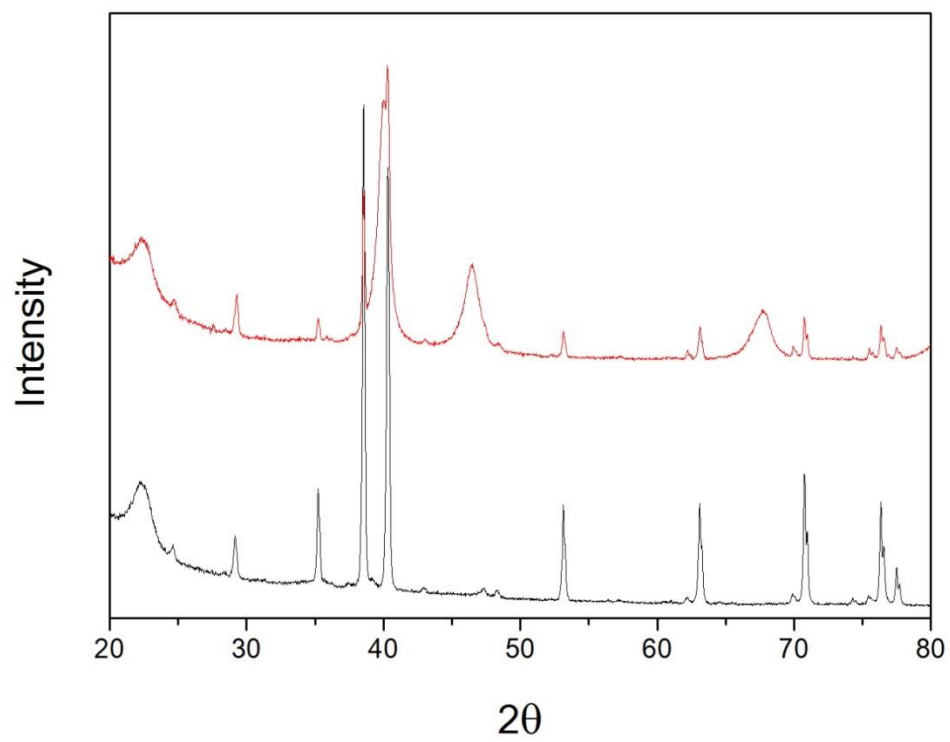

**Figure S4.** XRD patterns of Ti wire and Pt deposited Ti wire

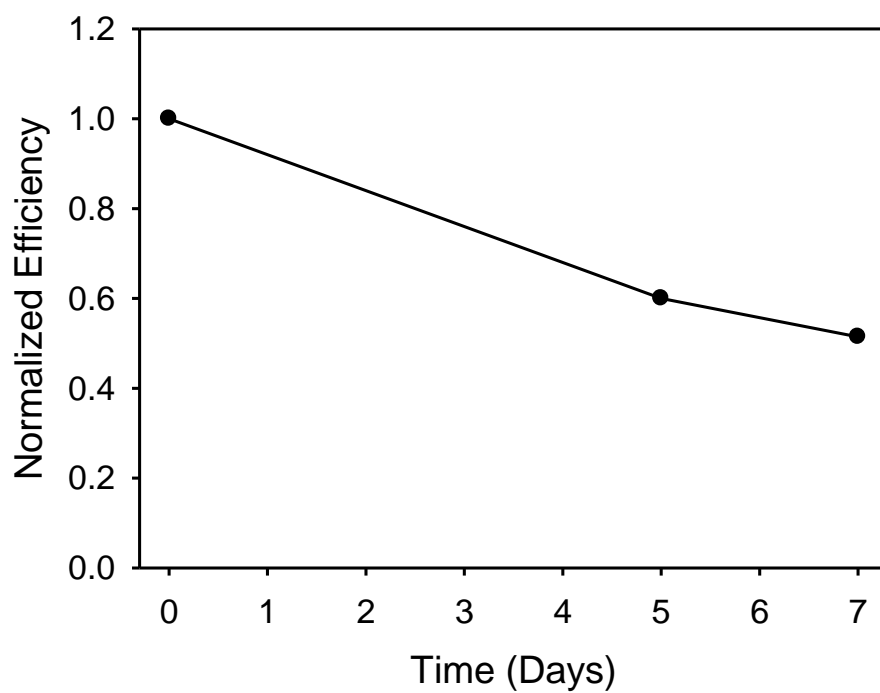

**Figure S5.** Normalized energy conversion efficiency of  $225\mu\text{m}$  distance between the electrodes with spacing  $0.75\text{mm}$  depends on the storage time

| Distance between Electrodes ( $\mu\text{m}$ ) |         | Jsc (mA/cm <sup>2</sup> ) | Voc (mV) | Fill Factor | Efficiency (%) |
|-----------------------------------------------|---------|---------------------------|----------|-------------|----------------|
| 225<br>(Weft spacing=0.75mm)                  | Trial ① | 1.04                      | 625      | 0.54        | 0.35           |
|                                               | Trial ② | 0.93                      | 675      | 0.58        | 0.36           |
|                                               | Trial ③ | 0.90                      | 655      | 0.55        | 0.32           |
| 225<br>(Weft spacing=1.5mm)                   | Trial ① | 1.42                      | 675      | 0.65        | 0.62           |
|                                               | Trial ② | 1.32                      | 685      | 0.63        | 0.57           |
|                                               | Trial ③ | 1.36                      | 708      | 0.60        | 0.58           |
| 350<br>(Weft spacing=0.75mm)                  | Trial ① | 0.47                      | 542      | 0.48        | 0.12           |
|                                               | Trial ② | 0.36                      | 550      | 0.52        | 0.10           |
|                                               | Trial ③ | 0.34                      | 585      | 0.55        | 0.11           |
| 350<br>(Weft spacing=1.5mm)                   | Trial ① | 1.10                      | 642      | 0.56        | 0.40           |
|                                               | Trial ② | 0.92                      | 635      | 0.60        | 0.35           |
|                                               | Trial ③ | 0.90                      | 666      | 0.62        | 0.37           |
| 475<br>(Weft spacing=0.75mm)                  | Trial ① | 0.60                      | 558      | 0.41        | 0.14           |
|                                               | Trial ② | 0.78                      | 595      | 0.35        | 0.16           |
|                                               | Trial ③ | 0.66                      | 604      | 0.31        | 0.12           |
| 475<br>(Weft spacing=1.5mm)                   | Trial ① | 1.42                      | 610      | 0.43        | 0.37           |
|                                               | Trial ② | 0.99                      | 644      | 0.49        | 0.31           |
|                                               | Trial ③ | 1.36                      | 615      | 0.38        | 0.32           |

**Table S1.** Performance of all of trial cells of Monolithic single layer textile DSSC depend on the distance between the electrodes with weft spacing 0.75mm, 1.5mm.
